# Supplementary material for: Ferroelectric enhanced Z-scheme P-doped g-C3N4/PANI/BaTiO3 ternary heterojunction with boosted visible-light photocatalytic water splitting
Source: Royal Society of Chemistry journal article supplement (doi:10.1039/c9nj00647h), 2019-01-01
Supplement: c9nj00647h1.pdf [file c9nj00647h1.pdf]

## Electronic Supplementary Information

### **Ferroelectric enhanced Z-scheme P doped g-C<sub>3</sub>N<sub>4</sub>/PANI/BaTiO<sub>3</sub> ternary heterojunction with boosted visible-light photocatalytic water splitting**

Qiannan Li,<sup>†</sup> Yuguo Xia,<sup>\*‡</sup> Kangliang Wei,<sup>†</sup> Xiaotong Ding,<sup>†</sup> Shun Dong,<sup>‡</sup> Xiuling  
Jiao<sup>\*†</sup>, Dairong Chen<sup>†‡</sup>

<sup>†</sup>*School of Chemistry & Chemical Engineering, Shandong University, Jinan 250100, P.*

*R. China*

<sup>‡</sup>*National Engineering Research Center for Colloidal Materials, Shandong University,*

*Jinan 250100, P. R. China*

**Theoretical calculation.** To better understand the electronic transfer mechanism involved in the interfaces of photocatalysts, spin-polarized density functional theory calculations were carried out with the Perdew-Burke-Ernzerhof (PBE) exchange correlation functional<sup>1</sup> and projector-augmented wave (PAW) pseudopotentials<sup>2</sup> as implemented in the Vienna ab initio simulation package (VASP)<sup>3,4</sup>. The wave functions were expanded in a plane wave basis with an energy cutoff of 500 eV. The gamma centered scheme K-points grid sampling was set at  $\Gamma$  point for all the calculations. The van der Waals (vdW) interactions were included which were corrected by the DFT-D3 approach<sup>5</sup> and all the structural relaxations were carried out until the residual forces were below 0.02 eV  $\text{\AA}^{-1}$ . To obtain exact band gaps of PCN and PCN/PANI heterostructure, Heyd-Scuseria-Ernzerhof (HSE) hybrid functional with  $\omega$  equals to 0.2  $\text{\AA}^{-1}$  was employed.<sup>6</sup>

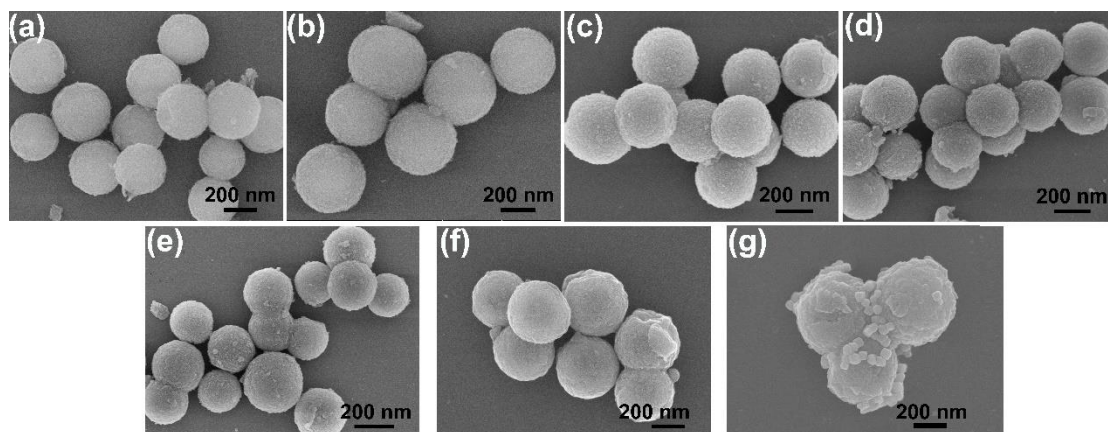

**Fig. S1.** SEM images for the morphology evolution in the synthetic process.

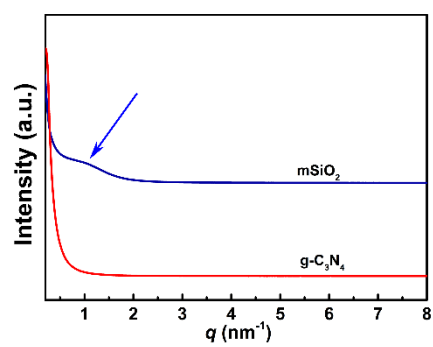

**Fig. S2.** SAXS patterns of mesoporous SiO<sub>2</sub> and g-C<sub>3</sub>N<sub>4</sub>.

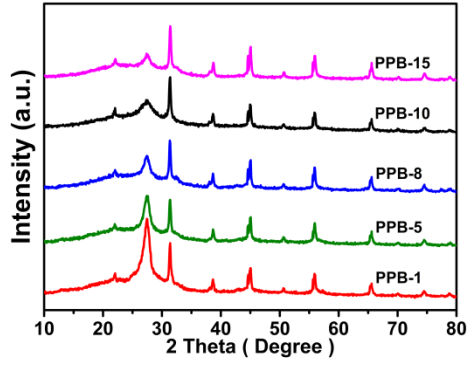

**Fig. S3.** XRD patterns of the PPB- $x$  samples.

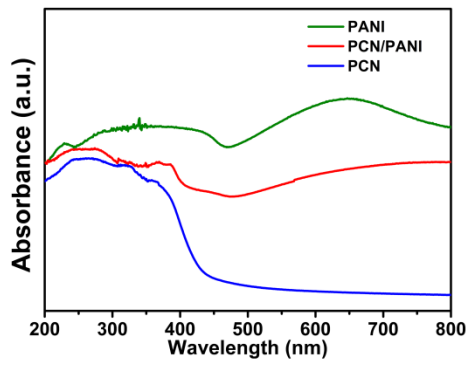

**Fig. S4.** UV-vis diffuse reflectance spectroscopy of PCN, PANI and PCN/PANI.

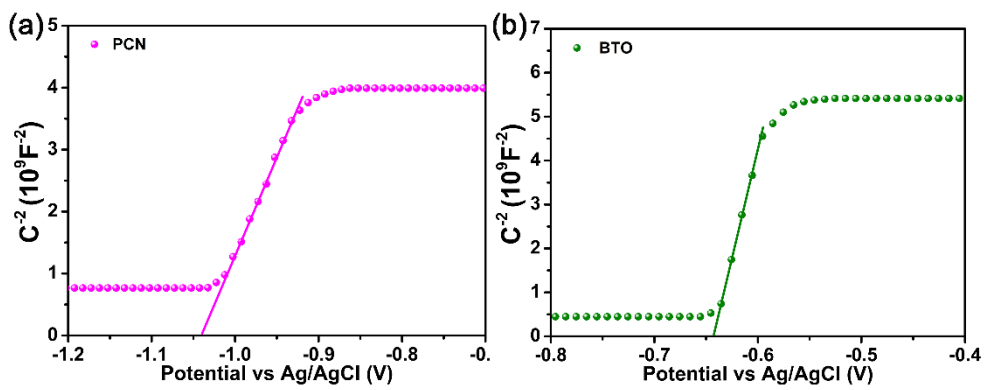

**Fig. S5.** Mott-Schottky plots for PCN and BTO.

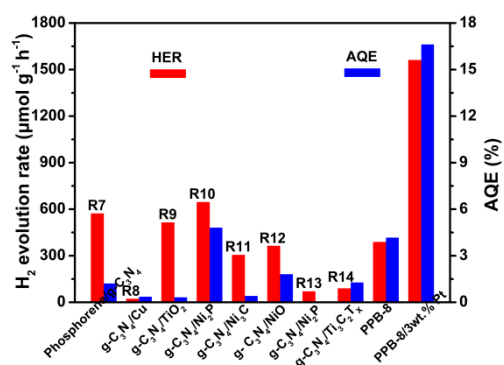

**Fig. S6.** Comparison of H<sub>2</sub> generation and AQE with that reported for other up-to-date g-C<sub>3</sub>N<sub>4</sub> based photocatalysts at 420 nm.

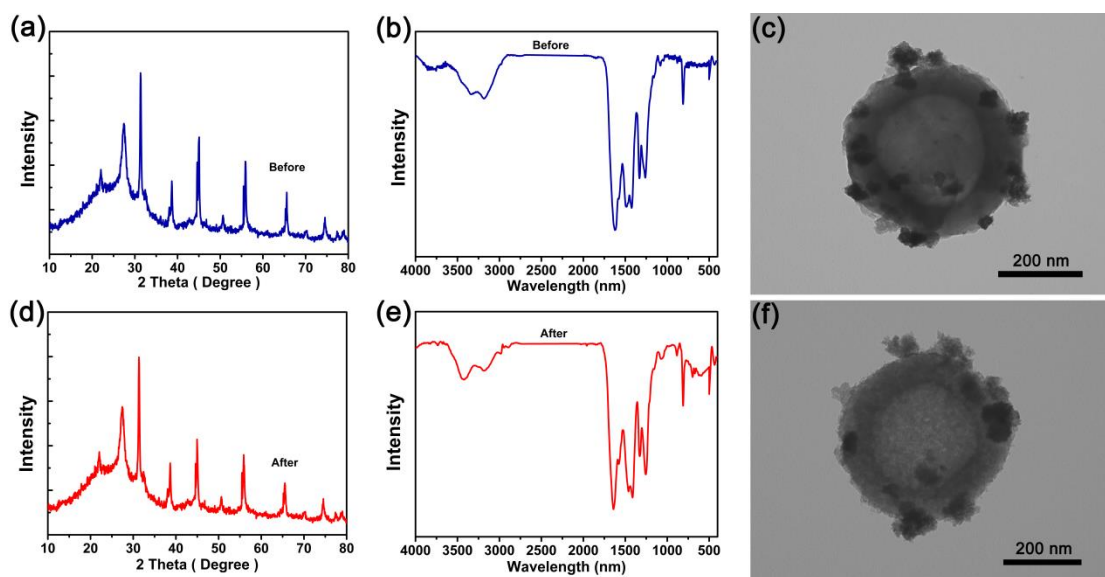

**Fig. S7.** Comparison of XRD, FT-IR and TEM of pristine PPB-8 photocatalyst and sample after six consecutive recycling experiments.

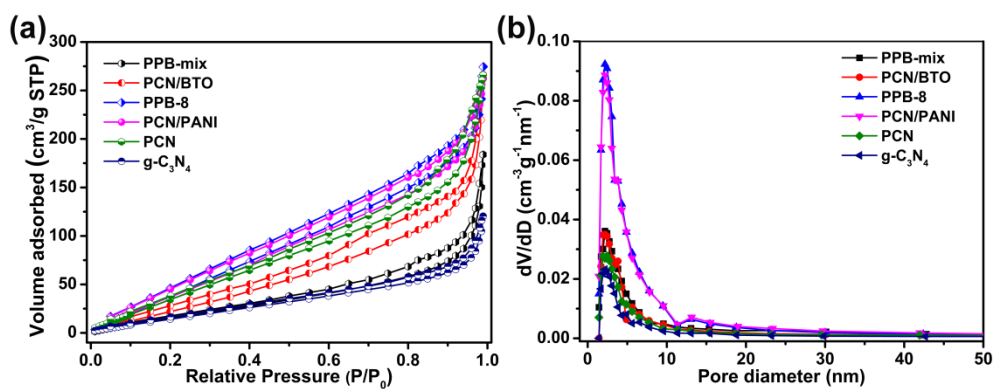

**Fig. S8.** (a) Nitrogen adsorption-desorption isotherms and (b) pore size distribution curve.

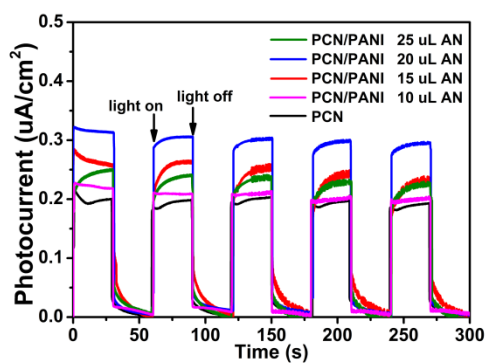

**Fig. S9.** Effect of loading amount of PANI on photocurrent.

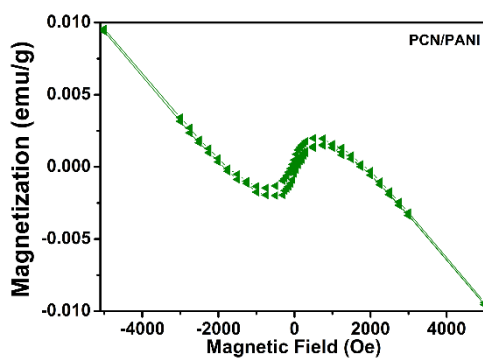

**Fig. S10.** Room temperature magnetic hysteresis loops of PCN/PANI.

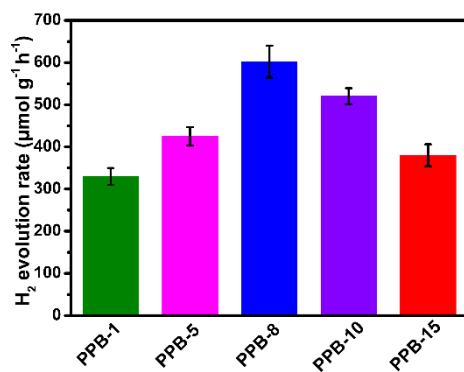

**Fig. S11.** Effect of loading amount of BTO on hydrogen evolution rate.

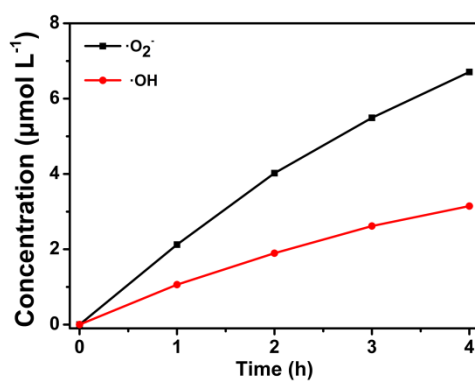

**Fig. S12.** Quantitative determination of generated •O<sub>2</sub><sup>-</sup> and •OH for PPB.

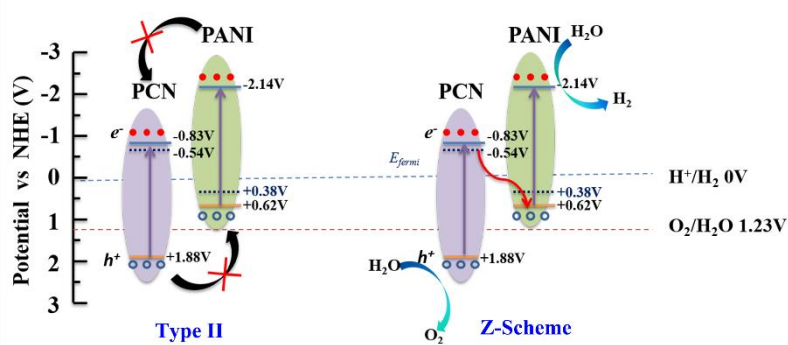

**Fig.S13.** Schematic diagram for photoinduced electron and hole transfer route in PCN/PANI junction.

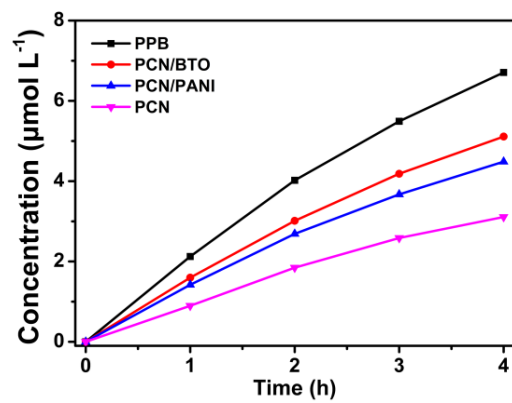

**Fig. S14.** Trapping rate comparison for PCN, PCN/PANI, PCN/BTO and PPB.



**Table S1.** Pore structure parameters obtained from the nitrogen desorption isotherm.

| <b>Sample</b>                       | <b>S<sub>bet</sub>/(m<sup>2</sup>/g)</b> | <b>V<sub>Tot</sub>/(cm<sup>3</sup> g<sup>-1</sup>)</b> | <b>D<sub>av</sub>/ (nm)</b> |
|-------------------------------------|------------------------------------------|--------------------------------------------------------|-----------------------------|
| <b>g-C<sub>3</sub>N<sub>4</sub></b> | 86                                       | 0.157                                                  | 9.1                         |
| <b>PCN</b>                          | 119                                      | 0.186                                                  | 8.7                         |
| <b>PCN/PANI</b>                     | 129                                      | 0.406                                                  | 6.3                         |
| <b>PPB-8</b>                        | 132                                      | 0.428                                                  | 6.0                         |
| <b>PCN/BTO</b>                      | 111                                      | 0.231                                                  | 10.1                        |
| <b>PPB-mix</b>                      | 98                                       | 0.224                                                  | 7.5                         |

**Table S2.** Physicochemical data of PPB-*x*.

| <b>Sample</b> | <b>BTO/(PPB)<br/>wt.%</b> | <b>Nanoparticle<br/>size<br/>nm</b> | <b>BET<br/>m<sup>2</sup> g<sup>-1</sup></b> | <b>Pore<br/>volume<br/>cm<sup>3</sup> g<sup>-1</sup></b> | <b>E<sub>g</sub><br/>eV</b> | <b>HER<br/>umol g<sup>-1</sup> h<sup>-1</sup></b> |
|---------------|---------------------------|-------------------------------------|---------------------------------------------|----------------------------------------------------------|-----------------------------|---------------------------------------------------|
| <b>PPB-1</b>  | 1                         | 40 ± 3                              | 122                                         | 0.412                                                    | 2.52                        | 329                                               |
| <b>PPB-5</b>  | 5                         | 40 ± 3                              | 138                                         | 0.436                                                    | 2.51                        | 424                                               |
| <b>PPB-8</b>  | 8                         | 40 ± 3                              | 132                                         | 0.428                                                    | 2.51                        | 602                                               |
| <b>PPB-10</b> | 10                        | 40 ± 3                              | 128                                         | 0.342                                                    | 2.51                        | 520                                               |
| <b>PPB-15</b> | 15                        | 40 ± 3                              | 120                                         | 0.297                                                    | 2.50                        | 380                                               |

## References

- 1 J. Heyd, G. E. Scuseria, M. Ernzerhof, *J.Chem.Phys.* 2003, 118, 8207.
- 2 J. P. Perdew, K. Burke, M. Ernzerhof, *Phys.Rev.Lett.* 1996, 77, 3865.
- 3 P. E. Blöchl, *Phys.Rev.B* 1994, 50, 17953.
- 4 G. Kresse, J. Furthmüller, *Comp.Mater.Sci.* 1996, 6, 15.
- 5 G. Kresse, J. Hafner, *Phys. Rev. B* 1993, 47, 558.
- 6 S. Grimme, J. Antony, S. Ehrlich, H. Krieg, *J.Chem.Phys.* 2010, 132, 154104.
- 7 J. Ran, W. Guo, H. Wang, B. Zhu, J. Yu, S. Z. Qiao, *Adv. Mater.*, 2018, **30**, 1800128.
- 8 M. S. Fan, C. J. Song, T. J. Chen, X. Yan, D. B. Xu, W. Gu, W. D. Shi, L. S. Xiao, *RSC Adv.*, 2016, **6**, 34633-34640.
- 8 Y. G. Tan, Z. Shu, J. Zhou, T. T. Li, W. B. Wang, Z. L. Zhao, *Appl. Catal., B*, 2018, **230**, 260-268
- 10 A. Indra, A. Acharjya, P. W. Menezes, C. Merschjann, D. Hollmann, M. Schwarze, M. Aktas, A. Friedrich, S. Lochbrunner, A. Thomas, M. Driess, *Angew. Chem., Int. Ed.*, 2017, **56** , 1653-1657.
- 11 K. L. He, J. Xie, Z.-Q. Liu, N. Li, X. B. Chen, J. Hu, X. Li, *J. Mater. Chem. A*, 2018, **6**, 13110-13122.
- 12 W. J. Wang, T. C. An, G. Y. Li, D. H. Xia, H. J. Zhao, J. C. Yu, P. K. Wong, *Appl. Catal., B*, 2017, **217**, 570-580.
- 13 J. N. Liu, Q. H. Jia, J. L. Long, X. X. Wang, Z. W. Gao, Q. Gu, *Appl. Catal., B*, 2018, **222**, 35-43.
- 14 Y. L. Sun, D. Jin, Y. Sun, X. Meng, Y. Gao, Y. Dall'Agnese, G. Chen, X.-F. Wang, *J. Mater. Chem. A*, 2018, **6**, 9124-9131.
